# Supplementary material for: Genomic analysis reveals high virulence and antibiotic resistance amongst phage susceptible Acinetobacter baumannii
Source: PubMed Central journal article supplement (PMC7528101; doi:10.1038/s41598-020-73123-y), 2020-09-30
Supplement: 41598_2020_73123_MOESM1_ESM.pdf [file 41598_2020_73123_MOESM1_ESM.pdf]

**Genomic analysis reveals high virulence and antibiotic resistance amongst phage susceptible *Acinetobacter baumannii***

Udomluk Leungtongkam<sup>1</sup>, Rapee Thummeepak<sup>1</sup>, Thawatchai Kitt<sup>2</sup>, Kannipa Tasanapak<sup>1</sup>, Jintana Wongwigkarn<sup>1</sup>, Kathryn M. Styles<sup>3</sup>, Elizabeth M. H. Wellington<sup>3</sup>, Andrew D. Millard<sup>4</sup> Antonia P. Sagona<sup>3</sup>, and Sutthirat Sitthisak<sup>1\*</sup>

<sup>1</sup>Department of Microbiology and Parasitology, Faculty of Medical Science, Naresuan University, Phitsanulok, 65000, Thailand

<sup>2</sup>Faculty of Oriental Medicine, Chiang Rai College, Chiang Rai, 57000, Thailand

<sup>3</sup>School of Life Sciences, University of Warwick, Coventry, CV4 7AL, United Kingdom

<sup>4</sup>Department of Genetics and Genome Biology, University of Leicester, Leicester, LE1 7RH, United Kingdom

\*Correspondence: Associate Professor Dr. Sutthirat Sitthisak

Address: Department of Microbiology and Parasitology, Faculty of Medical Science, Naresuan University, Phitsanulok, Thailand

(Tel): 66-55-964626, 66-84-5734203

(Fax): 66-55-964770

E-mail: [sutthirats@nu.ac.th](mailto:sutthirats@nu.ac.th)

**Fig. S1 Bacteriophage susceptibility test of vPhT02, vPhT04, vPhT39 and vPhT40 on *A. baumannii* strain AB329.**

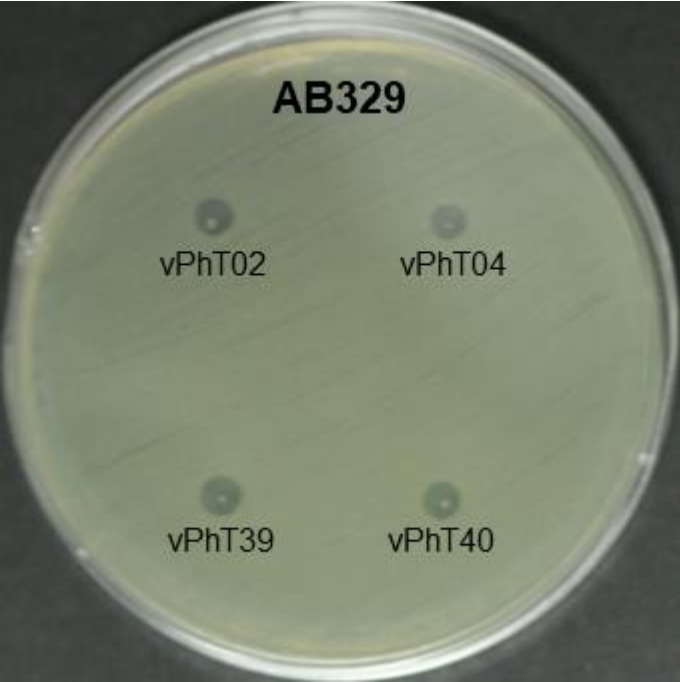

Table S1. Supplement of 230 *A. baumannii* isolates

| No | Strain ID | Hospitals | Phage susceptibility | Rep-types | Antibiotic resistance <sup>a</sup>              | Phenotype             | ompA gene | Biofilm formation | CRISPR-associated (cas) genes |
|----|-----------|-----------|----------------------|-----------|-------------------------------------------------|-----------------------|-----------|-------------------|-------------------------------|
| 1  | AB002     | HE        | 0                    | R34       | AK/CIP/SXT/CTX/IPM/MEM/PIP/TE/CRO/CN            | MDR-AB, CR-AB         | +         | -                 | -                             |
| 2  | AB003     | HE        | 9                    | R34       | CIP/CTX/CAZ/IPM/MEM/PIP/CRO                     | MDR-AB, CR-AB         | +         | +                 | cas1, cas3, cas5              |
| 3  | AB004     | HE        | 0                    | R34       | CIP/CTX/CAZ/IPM/MEM/PIP/CRO/CN                  | MDR-AB, CR-AB         | +         | +                 | cas1, cas3, cas5              |
| 4  | AB005     | HE        | 0                    | R34       | CIP/CTX/CAZ/IPM/MEM/PIP/CRO/CN                  | MDR-AB, CR-AB         | +         | -                 | cas1, cas3, cas5              |
| 5  | AB007     | HE        | 0                    | R34       | AK/CIP/SXT/CTX/CAZ/IPM/MEM/PIP/CRO/FEP/CN       | MDR-AB, CR-AB         | +         | -                 | -                             |
| 6  | AB008     | HE        | 4                    | R34       | AK/CIP/SXT/CTX/IPM/MEM/PIP/TE/CRO/CN            | MDR-AB, CR-AB         | +         | -                 | -                             |
| 7  | AB009     | HE        | 0                    | R34       | AK/CIP/SXT/CTX/IPM/MEM/PIP/CRO/CN               | MDR-AB, CR-AB         | -         | -                 | -                             |
| 8  | AB010     | HE        | 0                    | R34       | AK/CIP/SXT/CTX/CAZ/IPM/MEM/PIP/CRO/FEP/CN       | MDR-AB, CR-AB         | +         | -                 | -                             |
| 9  | AB011     | HE        | 4                    | R34       | AK/CIP/SXT/CTX/IPM/MEM/PIP/TE/CRO/CN            | MDR-AB, CR-AB         | +         | +                 | -                             |
| 10 | AB012     | HE        | 10                   | R34       | CIP/CTX/CAZ/IPM/MEM/PIP/CRO                     | MDR-AB, CR-AB         | +         | +                 | cas1, cas3, cas5              |
| 11 | AB013     | HE        | 6                    | R34       | AK/CIP/SXT/CTX/CAZ/IPM/MEM/PIP/TE/CRO/FEP/CN    | MDR-AB, CR-AB         | +         | +                 | -                             |
| 12 | AB014     | HA        | 2                    | R1        | AK/CIP/SXT/CTX/CAZ/IPM/MEM/PIP/TE/FEP/CN        | MDR-AB, CR-AB         | +         | +                 | -                             |
| 13 | AB015     | HA        | 0                    | R6        | No resistance                                   | Non MDR-AB            | -         | +                 | cas1, cas3, cas5              |
| 14 | AB016     | HA        | 2                    | R4        | AK/CIP/SXT/CTX/CAZ/SL/IPM/MEM/PIP/TE/CRO/FEP/CN | MDR-AB, CR-AB, XDR-AB | +         | +                 | -                             |
| 15 | AB021     | HA        | 0                    | R1        | CIP/SXT/CAZ/IPM/MEM/PIP/TE/CRO/FEP/CN           | MDR-AB, CR-AB         | +         | +                 | -                             |
| 16 | AB022     | HA        | 4                    | R4        | AK/CIP/SXT/CTX/CAZ/SL/IPM/MEM/PIP/TE/CRO/FEP/CN | MDR-AB, CR-AB, XDR-AB | +         | +                 | -                             |
| 17 | AB023     | HA        | 0                    | R16       | AK/CIP/SXT/CTX/CAZ/IPM/MEM/PIP/CRO/FEP/CN       | MDR-AB, CR-AB         | +         | +                 | -                             |
| 18 | AB025     | HA        | 4                    | R16       | AK/CIP/SXT/CTX/CAZ/IPM/MEM/PIP/TE/CRO/FEP/CN    | MDR-AB, CR-AB         | +         | +                 | -                             |
| 19 | AB027     | HA        | 0                    | R16       | IPM/MEM                                         | CR-AB                 | +         | +                 | cas2, cas6                    |
| 20 | AB028     | HA        | 2                    | R4        | AK/CIP/SXT/CTX/CAZ/SL/IPM/MEM/PIP/TE/CRO/FEP/CN | MDR-AB, CR-AB, XDR-AB | +         | +                 | -                             |
| 21 | AB029     | HA        | 2                    | R16       | AK/CIP/SXT/CTX/CAZ/IPM/MEM/CRO/FEP/CN           | MDR-AB, CR-AB         | +         | +                 | -                             |
| 22 | AB030     | HA        | 2                    | R16       | AK/CIP/SXT/CTX/CAZ/SL/IPM/MEM/PIP/CRO/FEP/CN    | MDR-AB, CR-AB         | +         | +                 | -                             |
| 23 | AB032     | HA        | 0                    | R7        | No resistance                                   | Non MDR-AB            | -         | +                 | -                             |
| 24 | AB035     | HA        | 0                    | R6        | No resistance                                   | Non MDR-AB            | -         | +                 | cas1, cas3, cas5              |
| 25 | AB037     | HA        | 0                    | R8        | No resistance                                   | Non MDR-AB            | -         | +                 | cas1, cas3, cas5              |
| 26 | AB038     | HA        | 0                    | R16       | AK/CIP/SXT/CTX/CAZ/IPM/MEM/PIP/CRO/FEP/CN       | MDR-AB, CR-AB         | -         | +                 | cas5                          |
| 27 | AB039     | HA        | 0                    | R9        | No resistance                                   | Non MDR-AB            | -         | +                 | -                             |
| 28 | AB040     | HA        | 2                    | R16       | AK/CIP/SXT/CTX/CAZ/SL/IPM/MEM/PIP/CRO/FEP/CN    | MDR-AB, CR-AB         | +         | +                 | -                             |
| 29 | AB043     | HA        | 2                    | R16       | AK/CIP/CTX/CAZ/SL/IPM/MEM/PIP/CRO/FEP/CN        | MDR-AB, CR-AB         | +         | +                 | -                             |
| 30 | AB044     | HA        | 0                    | R10       | No resistance                                   | Non MDR-AB            | -         | +                 | -                             |
| 31 | AB045     | HA        | 0                    | R6        | No resistance                                   | Non MDR-AB            | +         | +                 | -                             |
| 32 | AB047     | HA        | 0                    | R11       | No resistance                                   | Non MDR-AB            | +         | +                 | -                             |
| 33 | AB049     | HA        | 3                    | R16       | AK/CIP/SXT/CTX/CAZ/IPM/MEM/PIP/TE/CRO/FEP/CN    | MDR-AB, CR-AB         | +         | +                 | -                             |
| 34 | AB050     | HA        | 1                    | R12       | AK/CIP/SXT/CTX/CAZ/SL/IPM/MEM/PIP/CRO/FEP/CN    | MDR-AB, CR-AB         | -         | -                 | -                             |
| 35 | AB051     | HA        | 4                    | R16       | AK/CIP/CTX/CAZ/IPM/MEM/PIP/CN                   | MDR-AB, CR-AB         | -         | +                 | -                             |
| 36 | AB053     | HA        | 2                    | R15       | AK/CIP/SXT/CTX/CAZ/SL/IPM/MEM/PIP/TE/CRO/FEP/CN | MDR-AB, CR-AB, XDR-AB | +         | +                 | cas1                          |
| 37 | AB056     | HA        | 0                    | R6        | No resistance                                   | Non MDR-AB            | -         | +                 | cas5, cas6                    |
| 38 | AB057     | HA        | 2                    | R15       | AK/CIP/SXT/CTX/CAZ/SL/IPM/MEM/PIP/TE/CRO/FEP/CN | MDR-AB, CR-AB, XDR-AB | +         | +                 | cas1, cas3                    |
| 39 | AB058     | HA        | 0                    | R16       | AK/CIP/SXT/CTX/CAZ/IPM/MEM/PIP/CRO/FEP/CN       | MDR-AB, CR-AB         | -         | +                 | cas5                          |
| 40 | AB059     | HA        | 1                    | R4        | AK/CIP/SXT/CTX/CAZ/SL/IPM/MEM/PIP/TE/CRO/FEP/CN | MDR-AB, CR-AB, XDR-AB | +         | +                 | -                             |
| 41 | AB060     | HA        | 0                    | R11       | No resistance                                   | Non MDR-AB            | +         | +                 | -                             |
| 42 | AB061     | HA        | 4                    | R16       | AK/CIP/CTX/CAZ/IPM/MEM/PIP/TE/CRO/FEP/CN        | MDR-AB, CR-AB         | +         | +                 | -                             |
| 43 | AB063     | HA        | 3                    | R16       | AK/CIP/CTX/CAZ/SL/IPM/MEM/PIP/TE/CRO/FEP/CN     | MDR-AB, CR-AB         | +         | +                 | -                             |
| 44 | AB065     | HA        | 0                    | R16       | AK/CIP/SXT/CTX/CAZ/IPM/MEM/PIP/CRO/FEP/CN       | MDR-AB, CR-AB         | +         | +                 | cas1, cas3, cas5              |
| 45 | AB066     | HA        | 0                    | R12       | CIP/SXT/CTX/CAZ/IPM/MEM/PIP/CRO/FEP/CN          | MDR-AB, CR-AB         | +         | +                 | -                             |
| 46 | AB067     | HA        | 1                    | R16       | AK/CIP/SXT/CTX/CAZ/IPM/MEM/PIP/CRO/FEP/CN       | MDR-AB, CR-AB         | -         | +                 | cas1, cas3, cas5              |
| 47 | AB068     | HA        | 1                    | R16       | AK/CIP/SXT/CTX/CAZ/SL/IPM/MEM/PIP/CRO/FEP/CN    | MDR-AB, CR-AB         | -         | +                 | cas1, cas3, cas5              |
| 48 | AB069     | HA        | 3                    | R16       | AK/CIP/CTX/CAZ/SL/IPM/MEM/PIP/TE/CRO/FEP/CN     | MDR-AB, CR-AB         | +         | +                 | -                             |
| 49 | AB070     | HA        | 1                    | R16       | AK/CIP/SXT/CTX/CAZ/IPM/MEM/PIP/CRO/FEP/CN       | MDR-AB, CR-AB         | -         | +                 | cas1, cas3, cas5              |
| 50 | AB071     | HA        | 0                    | R16       | AK/CIP/SXT/CTX/CAZ/SL/IPM/MEM/PIP/CN            | MDR-AB, CR-AB         | +         | +                 | cas1, cas3, cas5              |
| 51 | AB072     | HA        | 0                    | R2        | No resistance                                   | Non MDR-AB            | +         | +                 | -                             |
| 52 | AB074     | HA        | 3                    | R16       | AK/CIP/CTX/CAZ/SL/IPM/MEM/PIP/TE/CRO/FEP/CN     | MDR-AB, CR-AB         | +         | +                 | -                             |
| 53 | AB075     | HA        | 2                    | R16       | AK/CIP/CTX/CAZ/SL/IPM/MEM/PIP/CRO/FEP/CN        | MDR-AB, CR-AB         | +         | +                 | -                             |
| 54 | AB077     | HA        | 2                    | R16       | AK/CIP/CTX/CAZ/IPM/MEM/PIP/TE/CRO/FEP/CN        | MDR-AB, CR-AB         | +         | +                 | -                             |
| 55 | AB081     | HA        | 2                    | R4        | AK/CIP/SXT/CTX/CAZ/SL/IPM/MEM/PIP/TE/CRO/FEP/CN | MDR-AB, CR-AB, XDR-AB | +         | +                 | -                             |
| 56 | AB082     | HA        | 6                    | R16       | AK/CIP/SXT/CTX/CAZ/IPM/MEM/PIP/TE/CRO/FEP/CN    | MDR-AB, CR-AB         | +         | +                 | -                             |
| 57 | AB084     | HA        | 5                    | R16       | AK/CIP/SXT/CTX/CAZ/IPM/MEM/PIP/TE/CRO/FEP/CN    | MDR-AB, CR-AB         | +         | +                 | -                             |
| 58 | AB085     | HA        | 2                    | R16       | AK/CIP/SXT/CTX/CAZ/IPM/MEM/PIP/TE/CRO/FEP/CN    | MDR-AB, CR-AB         | +         | +                 | -                             |
| 59 | AB086     | HA        | 0                    | R12       | CIP/CTX/CAZ/IPM/MEM/PIP/TE/CRO/FEP/CN           | MDR-AB, CR-AB         | +         | +                 | -                             |
| 60 | AB088     | HA        | 2                    | R16       | AK/CIP/CTX/CAZ/IPM/MEM/PIP/TE/CRO/FEP/CN        | MDR-AB, CR-AB         | +         | +                 | -                             |
| 61 | AB089     | HA        | 3                    | R4        | AK/CIP/SXT/CTX/CAZ/SL/IPM/MEM/PIP/TE/CRO/FEP/CN | MDR-AB, CR-AB, XDR-AB | +         | +                 | -                             |
| 62 | AB090     | HA        | 4                    | R16       | AK/CIP/CTX/CAZ/IPM/MEM/PIP/TE/CRO/CN            | MDR-AB, CR-AB         | +         | +                 | -                             |
| 63 | AB092     | HA        | 1                    | R27       | CIP/CTX/CAZ/SL/IPM/MEM/PIP/TE/CRO               | MDR-AB, CR-AB         | +         | +                 | cas6                          |
| 64 | AB123     | HB        | 3                    | R16       | CIP/SXT/CTX/CAZ/SL/IPM/MEM/PIP/TE/CRO/FEP/CN    | MDR-AB, CR-AB         | +         | +                 | -                             |
| 65 | AB124     | HB        | 0                    | R12       | CIP/CTX/CAZ/IPM/MEM/PIP/CRO/FEP                 | MDR-AB, CR-AB         | +         | +                 | -                             |
| 66 | AB125     | HB        | 3                    | R16       | AK/CIP/SXT/CTX/CAZ/IPM/MEM/PIP/TE/CRO/FEP       | MDR-AB, CR-AB         | -         | -                 | -                             |
| 67 | AB126     | HB        | 3                    | R16       | AK/CIP/SXT/CTX/CAZ/IPM/MEM/PIP/TE/CRO/FEP/CN    | MDR-AB, CR-AB         | +         | +                 | -                             |
| 68 | AB127     | HB        | 0                    | R16       | CIP/SXT/CTX/CAZ/PIP/TE/CRO/FEP/CN               | MDR-AB                | +         | +                 | -                             |
| 69 | AB128     | HB        | 5                    | R16       | AK/CIP/SXT/CTX/CAZ/IPM/MEM/PIP/TE/CRO/FEP/CN    | MDR-AB, CR-AB         | +         | +                 | -                             |
| 70 | AB129     | HB        | 0                    | R16       | AK/CIP/SXT/CTX/CAZ/IPM/MEM/PIP/TE/CRO/FEP/CN    | MDR-AB, CR-AB         | +         | -                 | -                             |
| 71 | AB130     | HB        | 3                    | R16       | AK/CIP/SXT/CTX/CAZ/IPM/MEM/PIP/TE/CRO/CN        | MDR-AB, CR-AB         | +         | -                 | -                             |
| 72 | AB131     | HB        | 3                    | R16       | AK/CIP/CTX/CAZ/SL/IPM/MEM/PIP/TE/CRO/FEP/CN     | MDR-AB, CR-AB         | +         | -                 | -                             |
| 73 | AB132     | HB        | 3                    | R16       | AK/CIP/SXT/CTX/CAZ/IPM/MEM/PIP/TE/CRO/FEP/CN    | MDR-AB, CR-AB         | +         | +                 | -                             |
| 74 | AB133     | HB        | 3                    | R16       | AK/CIP/SXT/CTX/CAZ/IPM/MEM/PIP/TE/CRO/FEP/CN    | MDR-AB, CR-AB         | +         | +                 | -                             |
| 75 | AB134     | HB        | 0                    | R16       | AK/CIP/SXT/CTX/CAZ/IPM/MEM/PIP/CRO/FEP/CN       | MDR-AB, CR-AB         | -         | +                 | cas1, cas3, cas5              |
| 76 | AB135     | HB        | 3                    | R4        | AK/CIP/SXT/CTX/CAZ/SL/IPM/MEM/PIP/TE/CRO/FEP/CN | MDR-AB, CR-AB, XDR-AB | -         | -                 | -                             |
| 77 | AB136     | HB        | 0                    | R16       | AK/CIP/SXT/CTX/CAZ/SL/IPM/MEM/PIP/TE/CRO/FEP/CN | MDR-AB, CR-AB, XDR-AB | -         | +                 | cas1, cas3, cas5              |
| 78 | AB137     | HB        | 1                    | R11       | CIP/SXT/CTX/MEM/CRO                             | MDR-AB, CR-AB         | +         | +                 | -                             |
| 79 | AB138     | HB        | 0                    | R12       | CIP/SXT/CTX/CAZ/SL/IPM/PIP/TE/CRO/FEP/CN        | MDR-AB, CR-AB         | +         | +                 | -                             |
| 80 | AB139     | HB        | 9                    | R11       | CIP/CTX/CAZ/CRO/FEP/CN                          | MDR-AB                | +         | +                 | cas1, cas3, cas5              |
| 81 | AB140     | HB        | 4                    | R4        | AK/CIP/SXT/CTX/CAZ/SL/IPM/MEM/PIP/TE/CRO/FEP/CN | MDR-AB, CR-AB, XDR-AB | +         | +                 | -                             |
| 82 | AB141     | HB        | 0                    | R12       | CIP/SXT/CTX/CAZ/IPM/PIP/TE/CRO/FEP/CN           | MDR-AB, CR-AB         | +         | +                 | -                             |
| 83 | AB194     | HB        | 0                    | R12       | CIP/CTX/CAZ/IPM/MEM/PIP/TE/CRO/FEP              | MDR-AB, CR-AB         | +         | -                 | -                             |
| 84 | AB195     | HB        | 0                    | R16       | AK/CIP/SXT/CTX/CAZ/IPM/MEM/PIP/CRO              | MDR-AB, CR-AB         | -         | +                 | cas1, cas3, cas5              |
| 85 | AB196     | HB        | 0                    | R12       | AK/CIP/SXT/CTX/CAZ/IPM/MEM/PIP/TE/CRO/FEP       | MDR-AB, CR-AB         | +         | -                 | -                             |
| 86 | AB197     | HB        | 1                    | R12       | CIP/SXT/CTX/CAZ/IPM/MEM/PIP/TE/CRO/FEP          | MDR-AB, CR-AB         | +         | -                 | -                             |
| 87 | AB198     | HB        | 0                    | R12       | AK/CIP/SXT/CTX/CAZ/IPM/MEM/PIP/TE/CRO/FEP       | MDR-AB, CR-AB         | +         | -                 | -                             |
| 88 | AB199     | HB        | 3                    | R16       | CIP/SXT/CTX/CAZ/IPM/MEM/PIP/TE/CRO/FEP          | MDR-AB, CR-AB         | +         | +                 | -                             |
| 89 | AB200     | HB        | 3                    | R16       | CIP/CTX/CAZ/IPM/MEM/PIP/TE/CRO/FEP              | MDR-AB, CR-AB         | +         | +                 | -                             |
| 90 | AB204     | HB        | 0                    | R12       | CIP/CTX/CAZ/CRO/TE                              | MDR-AB                | +         | +                 | -                             |
| 91 | AB205     | HB        | 0                    | R4        | No resistance                                   | Non MDR-AB            | +         | -                 | -                             |
| 92 | AB206     | HB        | 3                    | R16       | AK/CIP/SXT/CTX/CAZ/IPM/MEM/PIP/CRO/FEP/CN       | MDR-AB, CR-AB         | -         | +                 | cas1, cas3, cas5              |
| 93 | AB208     | HB        | 1                    | R16       | AK/CIP/SXT/CAZ/SL/IPM/MEM/PIP/TE/CRO/FEP/CN     | MDR-AB, CR-AB         | +         | +                 | -                             |
| 94 | AB209     | HB        | 3                    | R16       | AK/CIP/SXT/CAZ/SL/IPM/MEM/PIP/TE/CRO/FEP/CN     | MDR-AB, CR-AB         | +         | +                 | -                             |
| 95 | AB210     | HB        | 0                    | R12       | AK/CIP/SXT/CAZ/IPM/MEM/PIP/TE/CRO/FEP/CN        | MDR-AB, CR-AB         | +         | -                 | -                             |
| 96 | AB212     | HB        | 0                    | R16       | AK/CIP/SXT/CAZ/MEM/PIP/CRP/FEP/CN               | MDR-AB, CR-AB         | -         | +                 | cas1, cas3, cas5              |
| 97 | AB214     | HB        | 0                    | R12       | CIP/SXT/TE                                      | MDR-AB                | +         | +                 | -                             |

|     |       |    |   |     |                                                  |                       |   |   |                  |
|-----|-------|----|---|-----|--------------------------------------------------|-----------------------|---|---|------------------|
| 98  | AB215 | HB | 1 | R6  | No resistance                                    | Non MDR-AB            | + | + | cas6             |
| 99  | AB216 | HB | 3 | R16 | AK/CIP/SXT/CAZ/CSL/IPM/MEM/PIP/TE/CRO/FEP/CN     | MDR-AB, CR-AB         | + | + | -                |
| 100 | AB217 | HB | 3 | R16 | AK/CIP/SXT/CAZ/IPM/MEM/PIP/TE/CRO/FEP/CN         | MDR-AB, CR-AB         | + | + | -                |
| 101 | AB219 | HB | 0 | R12 | CIP/CAZ/PIP/CRO/FEP                              | MDR-AB                | - | + | -                |
| 102 | AB220 | HB | 3 | R16 | AK/CIP/SXT/CAZ/IPM/MEM/PIP/TE/CRO/CN             | MDR-AB, CR-AB         | + | - | -                |
| 103 | AB221 | HB | 2 | R16 | AK/CIP/SXT/CAZ/IPM/MEM/PIP/TE/CRO/FEP/CN         | MDR-AB, CR-AB         | + | + | -                |
| 104 | AB225 | HB | 2 | R16 | AK/CIP/SXT/CAZ/IPM/MEM/PIP/TE/CRO/FEP/CN         | MDR-AB, CR-AB         | + | - | -                |
| 105 | AB226 | HB | 0 | R12 | CIP/SXT/CTX/CAZ/IPM/PIP/CRO/FEP/CN               | MDR-AB, CR-AB         | + | + | -                |
| 106 | AB227 | HB | 1 | R16 | CIP/SXT/CTX/CAZ/IPM/MEM/PIP/TE/CRO/FEP/CN        | MDR-AB, CR-AB         | + | + | -                |
| 107 | AB228 | HB | 0 | R14 | No resistance                                    | Non MDR-AB            | - | - | -                |
| 108 | AB229 | HB | 3 | R4  | AK/CIP/SXT/CTX/CAZ/CSL/IPM/MEM/PIP/TE/CRO/FEP/CN | MDR-AB, CR-AB, XDR-AB | + | + | -                |
| 109 | AB094 | HC | 0 | R13 | No resistance                                    | Non MDR-AB            | + | + | cas6             |
| 110 | AB095 | HC | 0 | R4  | AK/CIP/SXT/CTX/CAZ/CSL/IPM/MEM/PIP/TE/CRO/FEP/CN | MDR-AB, CR-AB, XDR-AB | + | + | -                |
| 111 | AB097 | HC | 0 | R6  | No resistance                                    | Non MDR-AB            | + | + | -                |
| 112 | AB098 | HC | 0 | R12 | SXT/CTX/CAZ/CRO/FEP/TE                           | MDR-AB                | - | - | cas6             |
| 113 | AB099 | HC | 2 | R16 | AK/CIP/CTX/CAZ/IPM/MEM/PIP/TE/CRO/FEP/CN         | MDR-AB, CR-AB         | + | + | -                |
| 114 | AB101 | HC | 5 | R24 | AK/CIP/CTX/CAZ/IPM/MEM/PIP/TE/CRO/FEP/CN         | MDR-AB, CR-AB         | + | + | -                |
| 115 | AB102 | HC | 3 | R24 | IPM/MEM/PIP/TE/CN                                | MDR-AB, CR-AB         | + | + | -                |
| 116 | AB103 | HC | 0 | R8  | IPM/MEM                                          | CR-AB                 | + | + | cas2             |
| 117 | AB106 | HC | 0 | R6  | No resistance                                    | Non MDR-AB            | + | - | -                |
| 118 | AB109 | HC | 0 | R12 | CIP/CTX/CAZ/IPM/MEM/PIP/TE/CRO/FEP/CN            | MDR-AB, CR-AB         | + | + | -                |
| 119 | AB120 | HC | 0 | R1  | CIP/SXT/CTX/CAZ/CSL/IPM/MEM/PIP/CRO/FEP/CN       | MDR-AB, CR-AB         | + | + | -                |
| 120 | AB121 | HC | 3 | R24 | AK/CIP/CTX/CAZ/IPM/MEM/PIP/TE/CRO/CN             | MDR-AB, CR-AB         | + | + | -                |
| 121 | AB143 | HC | 0 | R16 | CIP/SXT/CTX/CAZ/IPM/MEM/PIP/TE/CRO/FEP/CN        | MDR-AB, CR-AB         | - | + | -                |
| 122 | AB148 | HC | 0 | R1  | CIP/SXT/CTX/CAZ/CSL/IPM/MEM/PIP/TE/CRO/FEP/CN    | MDR-AB, CR-AB         | + | + | -                |
| 123 | AB159 | HC | 0 | R12 | No resistance                                    | Non MDR-AB            | + | + | cas6             |
| 124 | AB162 | HC | 4 | R24 | AK/CTX/CAZ/CRO/FEP/CIP/CN/IPM/MEM/TE/PIP         | MDR-AB, CR-AB         | + | + | -                |
| 125 | AB163 | HC | 0 | R16 | CIP/SXT/CTX/CAZ/IPM/MEM/PIP/TE/CRO/FEP           | MDR-AB, CR-AB         | + | - | -                |
| 126 | AB166 | HC | 0 | R1  | CIP/SXT/CTX/CAZ/IPM/MEM/PIP/TE/CRO/FEP/CN        | MDR-AB, CR-AB         | + | - | -                |
| 127 | AB168 | HC | 0 | R1  | No resistance                                    | Non MDR-AB            | + | + | -                |
| 128 | AB172 | HC | 2 | R16 | AK/CIP/CTX/CAZ/IPM/MEM/PIP/TE/CRO/FEP/CN         | MDR-AB, CR-AB         | + | + | cas1             |
| 129 | AB175 | HC | 4 | R31 | AK/CIP/SXT/CTX/CAZ/IPM/MEM/PIP/TE/CRO/FEP/CN     | MDR-AB, CR-AB         | + | + | -                |
| 130 | AB176 | HC | 5 | R24 | AK/CIP/CTX/CAZ/IPM/MEM/PIP/TE/CRO/FEP/CN         | MDR-AB, CR-AB         | + | + | -                |
| 131 | AB177 | HC | 5 | R24 | AK/CIP/CTX/CAZ/IPM/MEM/PIP/TE/CRO/FEP/CN         | MDR-AB, CR-AB         | + | + | -                |
| 132 | AB180 | HC | 0 | R4  | AK/CIP/SXT/CTX/CAZ/CSL/IPM/MEM/PIP/TE/CRO/FEP/CN | MDR-AB, CR-AB, XDR-AB | + | + | -                |
| 133 | AB183 | HC | 3 | R4  | AK/CIP/SXT/CTX/CAZ/CSL/IPM/MEM/PIP/TE/CRO/FEP/CN | MDR-AB, CR-AB, XDR-AB | + | + | -                |
| 134 | AB185 | HC | 1 | R12 | AK/CIP/SXT/IPM/MEM/PIP/FEP/CN                    | MDR-AB, CR-AB         | - | + | cas1, cas3, cas5 |
| 135 | AB230 | HC | 5 | R24 | CIP/CTX/CAZ/IPM/MEM/PIP/TE/CRO                   | MDR-AB, CR-AB         | + | - | -                |
| 136 | AB231 | HC | 0 | R1  | CIP/CTX/CAZ/IPM/MEM/CRO/FEP                      | MDR-AB, CR-AB         | + | + | -                |
| 137 | AB232 | HC | 0 | R16 | CIP/SXT/CTX/CAZ/CSL/IPM/MEM/PIP/TE/CRO/FEP/CN    | MDR-AB, CR-AB         | + | + | -                |
| 138 | AB233 | HC | 2 | R24 | AK/CIP/SXT/CTX/CAZ/IPM/MEM/PIP/TE/CRO/FEP/CN     | MDR-AB, CR-AB         | + | + | -                |
| 139 | AB235 | HC | 0 | R1  | No resistance                                    | Non MDR-AB            | + | + | cas5             |
| 140 | AB237 | HC | 3 | R16 | AK/CIP/SXT/CTX/CAZ/IPM/MEM/PIP/TE/CRO/CN         | MDR-AB, CR-AB         | + | + | -                |
| 141 | AB239 | HC | 0 | R16 | CIP/CTX/CAZ/IPM/MEM/PIP/CRO/FEP/CN               | MDR-AB, CR-AB         | + | + | -                |
| 142 | AB241 | HC | 5 | R4  | AK/CIP/SXT/CTX/CAZ/CSL/IPM/MEM/PIP/TE/CRO/FEP/CN | MDR-AB, CR-AB, XDR-AB | + | - | -                |
| 143 | AB246 | HC | 0 | R4  | AK/CIP/SXT/CTX/CAZ/CSL/IPM/MEM/PIP/TE/CRO/FEP/CN | MDR-AB, CR-AB, XDR-AB | + | + | cas1, cas3, cas5 |
| 144 | AB248 | HC | 0 | R12 | No resistance                                    | Non MDR-AB            | + | + | -                |
| 145 | AB252 | HC | 0 | R16 | AK/CIP/CTX/CAZ/CSL/IPM/MEM/PIP/TE/CRO/FEP/CN     | MDR-AB, CR-AB         | + | - | -                |
| 146 | AB253 | HC | 0 | R16 | AK/CIP/SXT/CTX/CAZ/IPM/MEM/PIP/TE/CRO/FEP/CN     | MDR-AB, CR-AB         | + | - | -                |
| 147 | AB254 | HC | 0 | R21 | CIP/SXT/CTX/CAZ/CSL/IPM/MEM/PIP/TE/CRO/FEP/CN    | MDR-AB, CR-AB         | + | - | -                |
| 148 | AB255 | HC | 0 | R12 | No resistance                                    | Non MDR-AB            | + | - | -                |
| 149 | AB261 | HC | 0 | R2  | No resistance                                    | Non MDR-AB            | - | + | cas5             |
| 150 | AB265 | HC | 1 | R16 | AK/CIP/CTX/CAZ/IPM/MEM/PIP/TE/CRO/FEP/CN         | MDR-AB, CR-AB         | + | + | -                |
| 151 | AB266 | HC | 5 | R24 | AK/CIP/CTX/CAZ/IPM/MEM/PIP/TE/CRO/CN             | MDR-AB, CR-AB         | + | + | -                |
| 152 | AB269 | HC | 0 | R4  | AK/CIP/SXT/CTX/CAZ/CSL/IPM/MEM/PIP/TE/CRO/FEP/CN | MDR-AB, CR-AB, XDR-AB | + | - | -                |
| 153 | AB270 | HC | 0 | R14 | No resistance                                    | Non MDR-AB            | + | - | -                |
| 154 | AB275 | HC | 0 | R16 | IPM/MEM                                          | CR-AB                 | + | - | -                |
| 155 | AB279 | HC | 5 | R28 | AK/CIP/CTX/CAZ/IPM/MEM/PIP/TE/CRO/FEP/CN         | MDR-AB, CR-AB         | + | + | -                |
| 156 | AB280 | HC | 3 | R21 | AK/CIP/SXT/CTX/CAZ/IPM/MEM/PIP/TE/CRO/FEP/CN     | MDR-AB, CR-AB         | + | + | -                |
| 157 | AB284 | HC | 0 | R6  | No resistance                                    | Non MDR-AB            | + | - | -                |
| 158 | AB287 | HC | 6 | R22 | AK/CIP/CTX/CAZ/IPM/MEM/TE/CRO/CN                 | MDR-AB, CR-AB         | + | + | -                |
| 159 | AB313 | HD | 0 | R1  | AK/CIP/TMX/CTX/CAZ/IPM/MEM/PIP/CRO/FEP           | MDR-AB, CR-AB         | + | + | -                |
| 160 | AB314 | HD | 2 | R16 | CIP/TMX/CTX/CAZ/IPM/MEM/PIP/TE/CRO/FEP/CN        | MDR-AB, CR-AB         | + | + | -                |
| 161 | AB316 | HD | 6 | R12 | TMX/TE                                           | Non MDR-AB            | + | + | -                |
| 162 | AB318 | HD | 0 | R1  | AK/CIP/TMX/CTX/CAZ/IPM/MEM/PIP/CRO/FEP           | MDR-AB, CR-AB         | + | + | -                |
| 163 | AB319 | HD | 4 | R16 | CIP/TMX/CTX/CAZ/IPM/MEM/PIP/TE/CRO/FEP/CN        | MDR-AB, CR-AB         | + | + | -                |
| 164 | AB320 | HD | 5 | R4  | AK/CIP/TMX/CTX/CAZ/CSL/IPM/MEM/PIP/TE/CRO/FEP/CN | MDR-AB, CR-AB, XDR-AB | + | + | -                |
| 165 | AB324 | HD | 0 | R4  | AK/CIP/TMX/CTX/CAZ/CSL/IPM/MEM/PIP/TE/CRO/FEP/CN | MDR-AB, CR-AB, XDR-AB | + | + | -                |
| 166 | AB326 | HD | 0 | R16 | CIP/TMX/CTX/CAZ/CSL/IPM/MEM/PIP/TE/CRO/FEP/CN    | MDR-AB, CR-AB         | + | - | -                |
| 167 | AB327 | HD | 2 | R16 | CIP/TMX/CTX/CAZ/CSL/IPM/MEM/PIP/TE/CRO/FEP       | MDR-AB, CR-AB         | + | + | -                |
| 168 | AB328 | HD | 0 | R16 | CIP/TMX/CTX/CAZ/IPM/MEM/PIP/TE/CRO/FEP           | MDR-AB, CR-AB         | + | + | -                |
| 169 | AB329 | HD | 6 | R4  | AK/CIP/TMX/CTX/CAZ/CSL/IPM/MEM/PIP/TE/CRO/FEP/CN | MDR-AB, CR-AB, XDR-AB | + | + | -                |
| 170 | AB334 | HD | 0 | R16 | CIP/CTX/CAZ/CSL/IPM/MEM/PIP/TE/CRO/FEP           | MDR-AB, CR-AB         | + | + | -                |
| 171 | AB335 | HD | 0 | R4  | AK/CIP/TMX/CTX/CAZ/CSL/IPM/MEM/PIP/TE/CRO/FEP/CN | MDR-AB, CR-AB, XDR-AB | + | + | -                |
| 172 | AB339 | HD | 0 | R12 | CIP/TMX/CTX/CAZ/CSL/IPM/MEM/PIP/TE/CRO/FEP       | MDR-AB, CR-AB         | + | + | -                |
| 173 | AB340 | HD | 0 | R16 | AK/CIP/TMX/CTX/CAZ/CSL/IPM/MEM/PIP/TE/CRO/FEP    | MDR-AB, CR-AB         | + | + | -                |
| 174 | AB341 | HD | 0 | R16 | CIP/CTX/CAZ/CSL/IPM/MEM/PIP/TE/CRO/FEP           | MDR-AB, CR-AB         | + | + | -                |
| 175 | AB348 | HD | 0 | R8  | CIP/CTX/CAZ/IPM/MEM/PIP/CRO/FEP                  | MDR-AB, CR-AB         | - | + | -                |
| 176 | AB349 | HD | 3 | R16 | CIP/TMX/CTX/CAZ/IPM/MEM/PIP/TE/CRO/FEP           | MDR-AB, CR-AB         | + | + | -                |
| 177 | AB350 | HD | 2 | R4  | AK/CIP/TMX/CTX/CAZ/PIP/CT/GC/TE/CRO/FEP          | MDR-AB, CR-AB         | + | + | -                |
| 178 | AB353 | HD | 4 | R16 | CIP/TMX/CTX/CAZ/CSL/IPM/MEM/PIP/TE/CRO/FEP       | MDR-AB, CR-AB         | + | + | -                |
| 179 | AB354 | HD | 6 | R16 | CIP/TMX/CTX/CAZ/IPM/MEM/PIP/TE/CRO/FEP           | MDR-AB, CR-AB         | + | + | -                |
| 180 | AB355 | HD | 3 | R16 | CIP/TMX/CTX/CAZ/IPM/MEM/PIP/TE/CRO/FEP           | MDR-AB, CR-AB         | + | + | -                |
| 181 | AB360 | HD | 3 | R16 | CIP/TMX/CTX/CAZ/IPM/MEM/PIP/TE/CRO/FEP           | MDR-AB, CR-AB         | + | + | -                |
| 182 | AB361 | HD | 0 | R12 | CIP/CTX/CAZ/IPM/MEM/PIP/TE/CRO/FEP               | MDR-AB, CR-AB         | - | + | -                |
| 183 | AB367 | HD | 3 | R4  | AK/CIP/TMX/CTX/CAZ/CSL/IPM/MEM/PIP/TE/CRO/FEP/CN | MDR-AB, CR-AB, XDR-AB | + | + | -                |
| 184 | AB368 | HD | 6 | R4  | AK/CIP/TMX/CTX/CAZ/CSL/IPM/MEM/PIP/TE/CRO/FEP/CN | MDR-AB, CR-AB, XDR-AB | + | - | -                |
| 185 | AB369 | HD | 0 | R12 | CIP/TMX/CTX/CAZ/PIP/TE/CRO/FEP/CN                | MDR-AB                | + | + | -                |
| 186 | AB371 | HD | 6 | R16 | AK/CIP/TMX/CTX/CAZ/CSL/IPM/MEM/PIP/TE/CRO/FEP/CN | MDR-AB, CR-AB, XDR-AB | + | - | -                |
| 187 | AB373 | HD | 0 | R12 | CIP/TMX/CTX/CAZ/PIP/TE/CRO/FEP/CN                | MDR-AB                | + | + | -                |
| 188 | AB375 | HD | 0 | R5  | AK/CIP/TMX/CTX/CAZ/IPM/MEM/PIP/CRO/FEP           | MDR-AB, CR-AB         | + | + | -                |
| 189 | AB376 | HD | 1 | R4  | CIP/CTX/CAZ/CSL/IPM/MEM/PIP/TE/CRO/FEP           | MDR-AB, CR-AB         | + | - | -                |
| 190 | AB377 | HD | 0 | R1  | AK/CIP/TMX/CTX/CAZ/IPM/MEM/PIP/CRO/FEP           | MDR-AB, CR-AB         | + | + | -                |
| 191 | AB385 | HD | 6 | R4  | AK/CIP/TMX/CTX/CAZ/CSL/IPM/MEM/PIP/TE/CRO/FEP/CN | MDR-AB, CR-AB, XDR-AB | + | - | -                |
| 192 | AB388 | HD | 0 | R16 | CIP/TMX/CTX/CAZ/IPM/MEM/PIP/TE/CRO/FEP           | MDR-AB, CR-AB         | + | - | -                |
| 193 | AB389 | HD | 7 | R16 | CIP/TMX/CTX/CAZ/IPM/MEM/PIP/TE/CRO/FEP           | MDR-AB, CR-AB         | + | - | -                |
| 194 | AB394 | HD | 0 | R16 | TMX                                              | Non MDR-AB            | - | - | -                |
| 195 | AB396 | HD | 4 | R19 | CIP/CTX/CAZ/IPM/MEM/PIP/TE/CRO/FEP               | MDR-AB, CR-AB         | + | - | -                |
| 196 | AB403 | HD | 0 | R16 | CIP/TMX/CTX/CAZ/CSL/IPM/MEM/PIP/TE/CRO/FEP       | MDR-AB, CR-AB         | + | + | -                |
| 197 | AB404 | HD | 4 | R16 | CIP/TMX/CTX/CAZ/IPM/MEM/PIP/TE/CRO/FEP           | MDR-AB, CR-AB         | + | + | -                |
| 198 | AB405 | HD | 6 | R1  | AK/CIP/TMX/CTX/CAZ/CSL/IPM/MEM/PIP/TE/CRO/FEP/CN | MDR-AB, CR-AB, XDR-AB | + | - | -                |

|     |       |    |   |     |                                                  |                       |   |   |                  |
|-----|-------|----|---|-----|--------------------------------------------------|-----------------------|---|---|------------------|
| 199 | AB410 | HD | 3 | R16 | CIP/TMX/CTX/CAZ/CSL/IPM/MEM/PIP/TE/CRO/FEP       | MDR-AB, CR-AB         | + | + | -                |
| 200 | AB411 | HD | 0 | R4  | CIP/CTX/CAZ/CSL/IPM/MEM/PIP/TE/CRO/FEP           | MDR-AB, CR-AB         | + | - | -                |
| 201 | AB301 | HD | 0 | R12 | CTX/CAZ/CRO/CIP/CN/IPM/MEM/PIP                   | MDR-AB, CR-AB         | - | + | -                |
| 202 | AB302 | HD | 6 | R16 | AK/CTX/CAZ/CRO/FEP/CIP/CN/IPM/MEM/TMX/TE/ PIP    | MDR-AB, CR-AB         | + | - | -                |
| 203 | AB303 | HD | 0 | R16 | CTX/CAZ/CRO/CN/ TMX/TE/PIP                       | MDR-AB                | + | + | -                |
| 204 | AB305 | HD | 0 | R12 | CTX/CAZ/CRO/FEP/CIP/CN/TMX/TE                    | MDR-AB                | + | - | -                |
| 205 | AB310 | HD | 3 | R12 | CTX/CAZ/CRO/FEP/CIP/IPM/MEM/TE/PIP               | MDR-AB, CR-AB         | + | - | -                |
| 206 | AB412 | HF | 0 | R35 | AK/CTX/CAZ/CRO/CIP/CN/IPM/MEM/TMX/PIP            | MDR-AB, CR-AB         | + | - | -                |
| 207 | AB415 | HF | 0 | R36 | CTX/CAZ/CRO/FEP/CIP/CN/IPM/MEM/TMX/PIP           | MDR-AB, CR-AB         | + | - | -                |
| 208 | AB416 | HF | 0 | R37 | CTX/CAZ/CRO/FEP/CIP/CN/IPM/MEM/TMX/PIP           | MDR-AB, CR-AB         | + | - | -                |
| 209 | AB418 | HF | 0 | R36 | CTX/CAZ/CRO/FEP/CIP/CN/IPM/MEM/TMX/PIP           | MDR-AB, CR-AB         | + | - | -                |
| 210 | AB419 | HF | 0 | R38 | AK/CTX/CAZ/CRO/FEP/CIP/IPM/MEM/TMX/TE/PIP        | MDR-AB, CR-AB         | + | + | cas1, cas3, cas5 |
| 211 | AB420 | HF | 0 | R38 | AK/CTX/CAZ/CRO/FEP/CIP/IPM/MEM/TMX/PIP           | MDR-AB, CR-AB         | + | + | cas1, cas3, cas5 |
| 212 | AB421 | HF | 0 | R36 | AK/CTX/CAZ/CRO/FEP/CIP/IPM/MEM/TMX/TE/PIP        | MDR-AB, CR-AB         | + | - | -                |
| 213 | AB422 | HF | 0 | R36 | AK/CTX/CAZ/CRO/CIP/CN/IPM/MEM/TMX/PIP            | MDR-AB, CR-AB         | + | - | -                |
| 214 | AB423 | HF | 0 | R38 | AK/CTX/CAZ/CRO/FEP/CIP/CN/IPM/MEM/TMX/PIP        | MDR-AB, CR-AB         | + | + | cas1, cas3, cas5 |
| 215 | AB424 | HF | 0 | R35 | AK/CIP/TMX/CTX/CAZ/CSL/IPM/MEM/PIP/TE/CRO/FEP/CN | MDR-AB, CR-AB, XDR-AB | + | - | -                |
| 216 | AB429 | HF | 0 | R36 | AK/CTX/CAZ/CRO/FEP/CIP/CN/IPM/MEM/TMX/PIP        | MDR-AB, CR-AB         | + | - | -                |
| 217 | AB430 | HF | 0 | R38 | AK/CTX/CAZ/CRO/FEP/CIP/IPM/MEM/TMX/TE/PIP        | MDR-AB, CR-AB         | + | + | cas1, cas3, cas5 |
| 218 | AB431 | HF | 0 | R36 | CTX/CAZ/CRO/FEP/CIP/CN/IPM/MEM/TMX/PIP           | MDR-AB, CR-AB         | + | - | -                |
| 219 | AB433 | HF | 0 | R37 | CTX/CAZ/CRO/FEP/CIP/CN/IPM/MEM/TMX/TE/PIP        | MDR-AB, CR-AB         | + | + | cas1, cas3, cas5 |
| 220 | AB437 | HF | 0 | R39 | No resistance                                    | Non MDR-AB            | + | + | cas1, cas3, cas5 |
| 221 | AB439 | HF | 0 | R37 | CTX/CAZ/CRO/FEP/CIP/CN/IPM/MEM/TMX/TE/SCF/PIP    | MDR-AB, CR-AB         | + | + | -                |
| 222 | AB440 | HF | 0 | R37 | CTX/CAZ/CRO/FEP/CIP/CN/IPM/MEM/TMX/TE/SCF/PIP    | MDR-AB, CR-AB         | + | + | -                |
| 223 | AB443 | HF | 0 | R37 | CTX/CAZ/CRO/CN/FEP/CIP/IPM/MEM/TMX/TE/SCF/PIP    | MDR-AB, CR-AB         | + | + | -                |
| 224 | AB446 | HF | 0 | R38 | AK/CTX/CAZ/CRO/FEP/CIP/IPM/MEM/PIP               | MDR-AB, CR-AB         | + | + | cas1, cas3, cas5 |
| 225 | AB448 | HF | 0 | R38 | CTX/CAZ/CRO/CIP/IPM/MEM/TMX/PIP                  | MDR-AB, CR-AB         | + | + | cas1, cas3, cas5 |
| 226 | AB449 | HF | 0 | R40 | AK/CTX/CAZ/CRO/FEP/CIP/IPM/MEM/TMX/PIP           | MDR-AB, CR-AB         | + | + | -                |
| 227 | AB451 | HF | 0 | R35 | AK/CTX/CAZ/CRO/FEP/CIP/CN/IPM/MEM/TMX/TE/PIP     | MDR-AB, CR-AB         | + | + | -                |
| 228 | AB452 | HF | 0 | R38 | AK/CTX/CAZ/CRO/FEP/CIP/IPM/MEM/TMX/PIP           | MDR-AB, CR-AB         | + | + | cas1, cas3, cas5 |
| 229 | AB455 | HF | 0 | R37 | CTX/CAZ/CRO/FEP/CIP/CN/IPM/MEM/TMX/TE/SCF/PIP    | MDR-AB, CR-AB         | + | + | -                |
| 230 | AB456 | HF | 0 | R37 | CTX/CAZ/CRO/FEP/CIP/CN/IPM/MEM/TMX/TE/SCF/PIP    | MDR-AB, CR-AB         | + | + | -                |

<sup>a</sup>AK: amikacin, CTX: cefotaxime, CAZ: ceftazidime, CRO: ceftriaxone, FEP: cefepime, CIP: ciprofloxacin, CN: gentamicin, IMP: imipenem, MEM: meropenem, SXT: trimethoprim/sulfamethoxazole, TE: tetracycline, SCF: cefoperazone/subactam and TZP: piperacillin/tazobactam.

**Table S2. REP-PCR typing among phage susceptible and resistant *A. baumannii* strains**

| REP-PCR typing | No. of isolates              |                            |
|----------------|------------------------------|----------------------------|
|                | Phage susceptible<br>(n=107) | Phage resistant<br>(n=123) |
| R1             | 1/107 (0.93%)                | 10/123 (8.13%)             |
| R2             | 0/107 (0.00%)                | 2/123 (1.63%)              |
| R3             | 0/107 (0.00%)                | 0/123 (0.00%)              |
| R4             | 18/107 (16.82%)              | 8/123 (6.50%)              |
| R5             | 0/107 (0.00%)                | 1/123 (0.81%)              |
| R6             | 1/107 (0.93%)                | 6/123 (4.88%)              |
| R7             | 0/107 (0.00%)                | 1/123 (0.81%)              |
| R8             | 0/107 (0.00%)                | 3/123 (2.44%)              |
| R9             | 0/107 (0.00%)                | 1/123 (0.81%)              |
| R10            | 0/107 (0.00%)                | 1/123 (0.81%)              |
| R11            | 2/107 (1.87%)                | 2/123 (1.63%)              |
| R12            | 4/107 (3.74%)                | 23/123 (18.70%)            |
| R13            | 0/107 (0.00%)                | 2/123 (1.63%)              |
| R14            | 0/107 (0.00%)                | 2/123 (1.63%)              |
| R15            | 2/107 (1.87%)                | 0/123 (0.00%)              |
| R16            | 59/107 (55.14%)              | 28/123 (22.76%)            |
| R17            | 0/107 (0.00%)                | 0/123 (0.00%)              |
| R18            | 0/107 (0.00%)                | 0/123 (0.00%)              |
| R19            | 1/107 (0.93%)                | 0/123 (0.00%)              |
| R20            | 0/107 (0.00%)                | 0/123 (0.00%)              |
| R21            | 1/107 (0.93%)                | 2/123 (1.63%)              |
| R22            | 1/107 (0.93%)                | 0/123 (0.00%)              |
| R23            | 0/107 (0.00%)                | 0/123 (0.00%)              |
| R24            | 9/107 (8.41%)                | 0/123 (0.00%)              |
| R25            | 0/107 (0.00%)                | 0/123 (0.00%)              |
| R26            | 0/107 (0.00%)                | 0/123 (0.00%)              |
| R27            | 1/107 (0.93%)                | 0/123 (0.00%)              |
| R28            | 1/107 (0.93%)                | 0/123 (0.00%)              |
| R29            | 0/107 (0.00%)                | 0/123 (0.00%)              |
| R30            | 0/107 (0.00%)                | 0/123 (0.00%)              |
| R31            | 1/107 (0.93%)                | 0/123 (0.00%)              |
| R32            | 0/107 (0.00%)                | 0/123 (0.00%)              |
| R33            | 0/107 (0.00%)                | 0/123 (0.00%)              |
| R34            | 5/107 (4.67%)                | 6/123 (4.88%)              |
| R35            | 0/107 (0.00%)                | 3/123 (2.44%)              |
| R36            | 0/107 (0.00%)                | 6/123 (4.88%)              |
| R37            | 0/107 (0.00%)                | 7/123 (5.69%)              |
| R38            | 0/107 (0.00%)                | 7/123 (5.69%)              |
| R39            | 0/107 (0.00%)                | 1/123 (0.81%)              |
| R40            | 0/107 (0.00%)                | 1/123 (0.81%)              |

**Table S3. List of primers used in this study to detect CRISPR-associated (*cas*) genes**

| No. multiplex | Target genes | Primer name             | Sequence (5'-3')        | Templates<br>(Genbank accession no.) | Amplicon size (bp) |
|---------------|--------------|-------------------------|-------------------------|--------------------------------------|--------------------|
| Multiplex-1   | <i>cas1</i>  | cas1_506-F              | GCTGCGATGCGAATGTTATGT   | CP030106.1                           | 506                |
|               |              | cas1_506-R              | AGTACCCAAAGTGTCGTCGC    |                                      |                    |
|               | <i>cas2</i>  | cas2_196-F              | CCGCTATGGTGTTTAAGTTACGA | UFJW01000108.1                       | 196                |
|               |              | cas2_196-R              | GAAAAACCGCAAGACGGTCA    |                                      |                    |
| <i>cas3</i>   | cas3_850-F   | ACTTGATTATGATGCTATGCCCA | CP030106.1              | 850                                  |                    |
|               | cas3_850-R   | TCGCTCTTGTTCACTGCGTA    |                         |                                      |                    |
| Multiplex-2   | <i>cas5</i>  | cas5_611-F              | TGCTTGTGCTTTAGGTGAGCA   | JZBV01000044.1                       | 611                |
|               |              | cas5_611-R              | CACCGTATGGCTCAATCGCA    |                                      |                    |
|               | <i>cas6</i>  | cas6_432-F              | GGAAACTGCCTGCGCATTAC    | CP015121.1                           | 432                |
|               |              | cas6_432-R              | ATCCCGCGTTTTCACTCTCC    |                                      |                    |
|               | <i>cas9</i>  | cas9_247-F              | ACTCTCGAAGACAAAGCGCA    | CP015145.1                           | 247                |
|               |              | cas9_247-R              | TGGTTGCGACCACACAGTTT    |                                      |                    |
